# Supplementary material for: ATGL/CGI-58-Dependent Hydrolysis of a Lipid Storage Pool in Murine Enterocytes
Source: PubMed Central journal article supplement (PMC6713565; doi:10.1016/j.celrep.2019.07.030), 2019-08-13
Supplement: EMS84137-supplement-Supplement.pdf [file EMS84137-supplement-Supplement.pdf]

**Cell Reports, Volume 28**

**Supplemental Information**

**ATGL/CGI-58-Dependent Hydrolysis  
of a Lipid Storage Pool in Murine Enterocytes**

**Melanie Korbalius, Nemanja Vujic, Vinay Sachdev, Sascha Obrowsky, Silvia Rainer, Benjamin Gottschalk, Wolfgang F. Graier, and Dagmar Kratky**

## Supplemental Figures

Figure S1

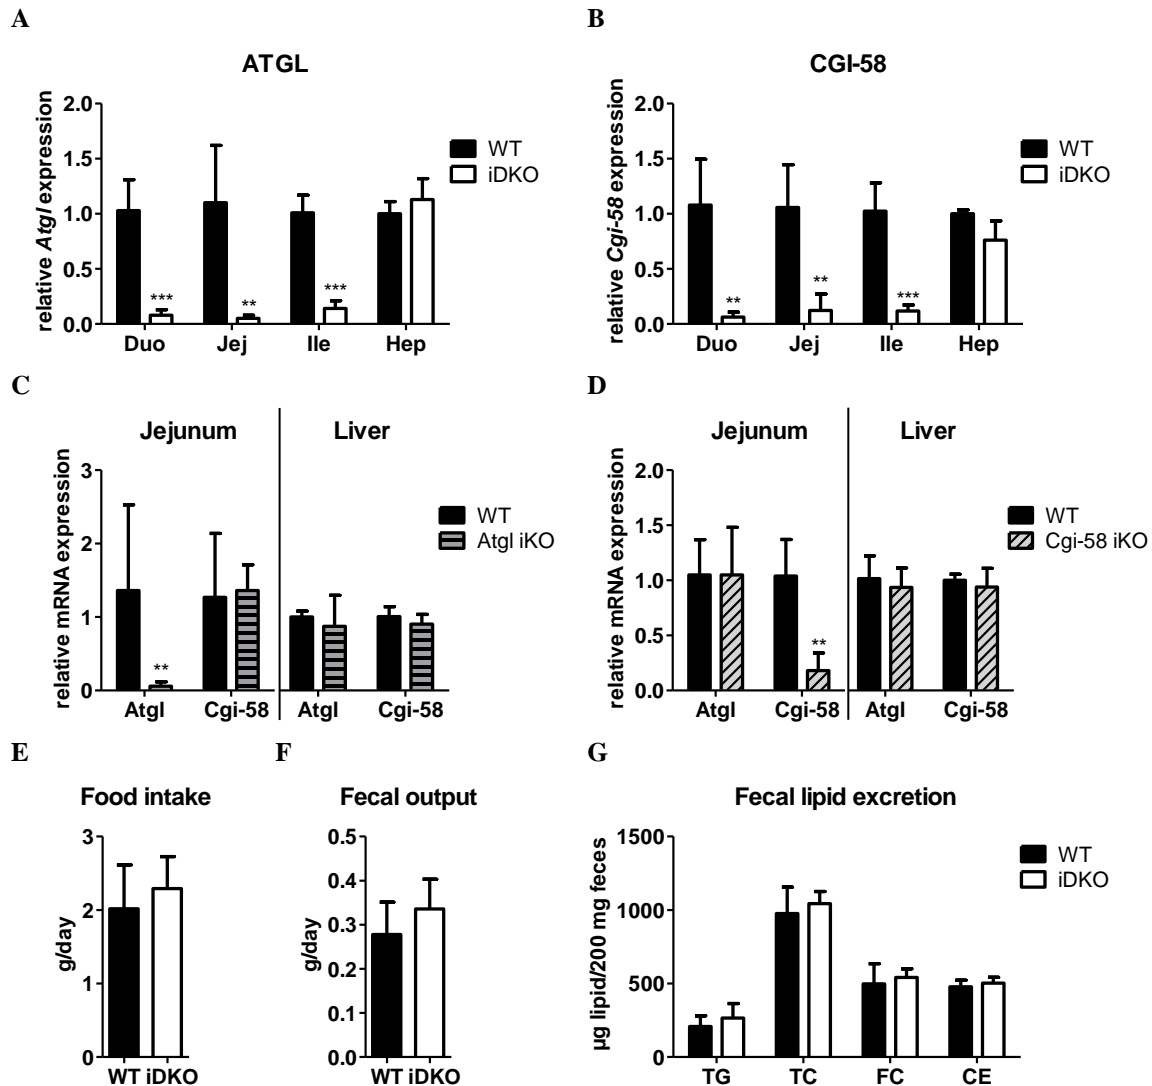

**Figure S1: Efficient knockout of intestinal ATGL and CGI-58, related to Figure 1.** Intestinal and hepatic gene expression of A) *Atgl* and B) *Cgi-58* in iDKO mice (n=4). *Atgl* and *Cgi-58* mRNA expression in jejunum and liver of C) *Atgl* iKO (n=3-4) and D) *Cgi-58* iKO mice (n=4). E) Food intake was monitored for three consecutive days in iDKO and WT mice fed HF/HCD for 5 weeks (n=5). Feces were collected daily and lipids were extracted from 200 mg pulverized feces using the Folch method. F) Fecal output and G) fecal lipid excretion in HF/HCD-fed WT and iDKO mice (n=5). Data represent mean + SD. \*\* p ≤ 0.01 \*\*\* p ≤ 0.001. Duo, duodenum; Jej, jejunum; Ile, ileum; Hep, hepar (liver); TG, triglycerides; TC, total cholesterol; FC, free cholesterol; CE, cholesteryl esters.

Figure S2

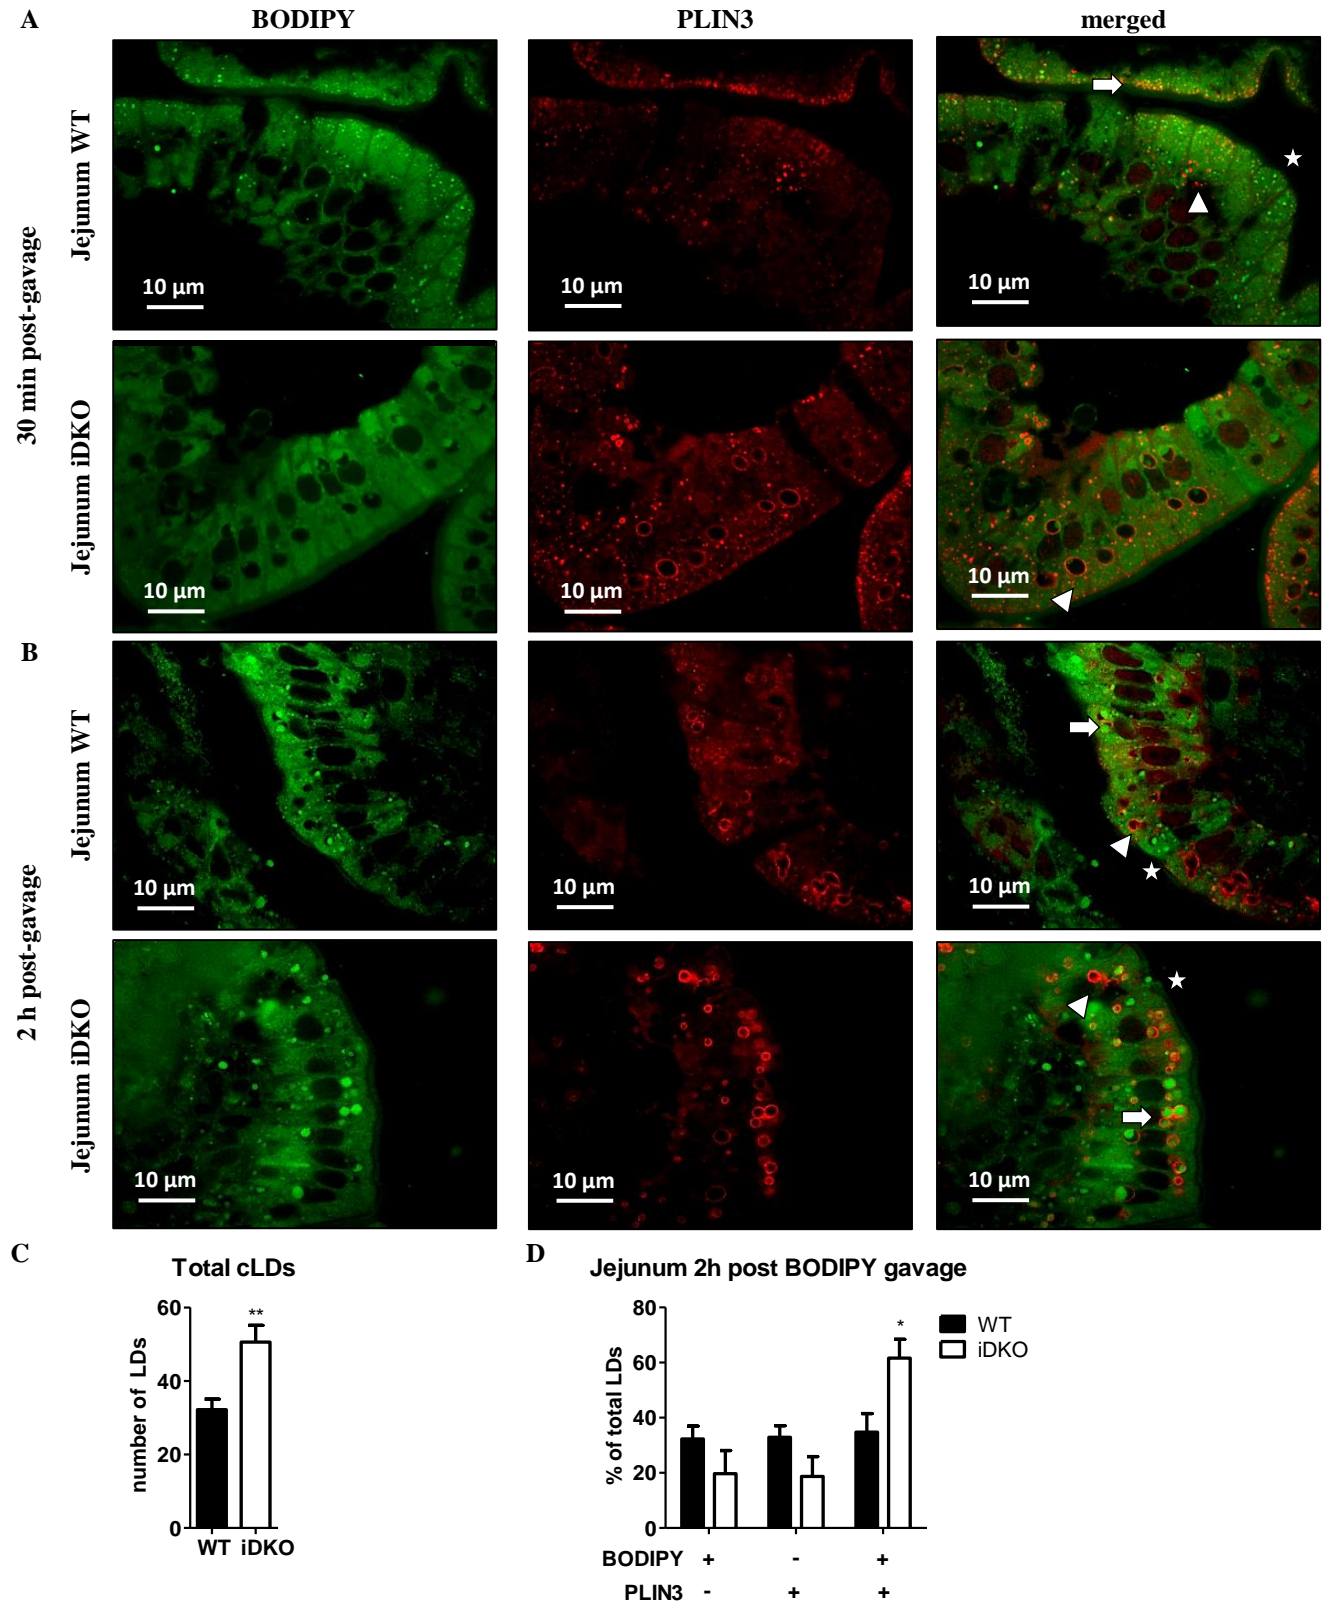

**Figure S2: Different fates of lipids 30 min and 2 h post-gavage in iDKO mice, related to Figure 2.** Perilipin 3 (PLIN3; red) immunofluorescence staining in the jejunum of BODIPY<sup>®</sup>-gavaged (green) WT and iDKO mice A) 30 min and B) 2 h post-gavage. C) Total number of lipid droplets (LDs) in the jejunum of WT and iDKO mice 2 h post BODIPY<sup>®</sup> gavage. D) Relative amount of cLDs containing BODIPY<sup>®</sup>, coated with PLIN3, and BODIPY<sup>®</sup>-containing PLIN3-coated vesicles 2 h post gavage. LDs were quantitated by counting of multiple fluorescence micrographs (n=5). Data represent mean + SEM. \* p < 0.05; \*\* p ≤ 0.01. Arrows indicate cLDs originating from BODIPY<sup>®</sup>-labeled FA, which colocalize with PLIN3; arrowheads indicate endogenous cLDs coated with PLIN3; stars indicate BODIPY<sup>®</sup>-containing cLDs, which do not colocalize with PLIN3. Magnification, 100x.

Figure S3

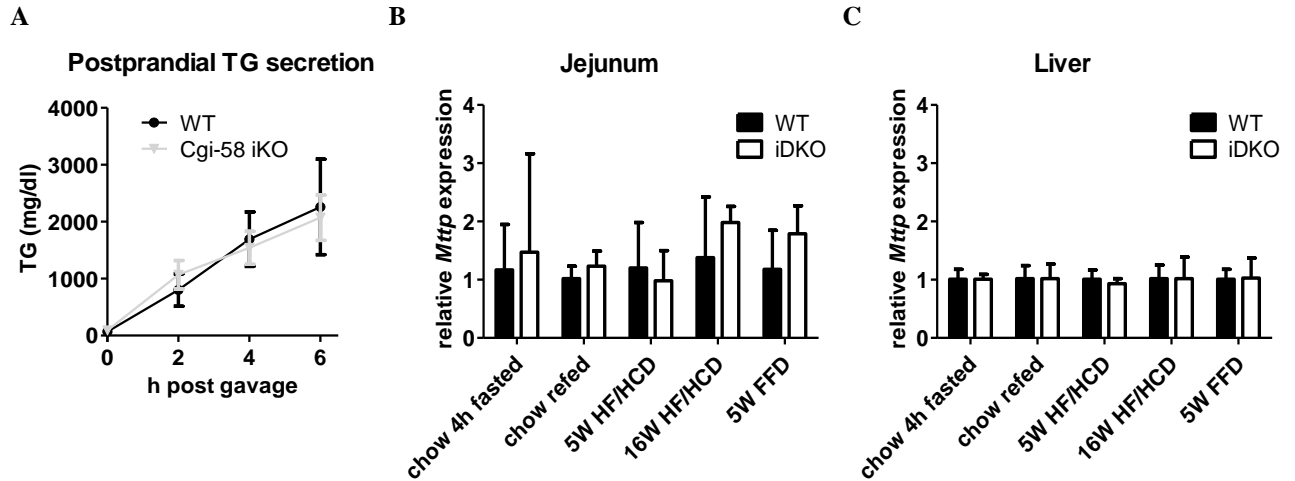

**Figure S3: Intestinal ATGL/CGI-58 deficiency does not affect intestinal lipoprotein metabolism, related to Figure 3.** A) Postprandial TG secretion in Cgi-58 iKO mice (n=5) after tyloxapol injection followed by an oral oil bolus (500  $\mu$ l olive oil). B) Jejunal and C) hepatic *Mttp* mRNA expression in WT and iDKO mice. Data were normalized to the expression of cyclophilin A as housekeeping gene and represent mean (n=4-7)  $\pm$  SD. *Mttp*, microsomal triglyceride transfer protein; HF/HCD, high-fat/high-cholesterol diet; FFD, fat-free diet.

Figure S4

A

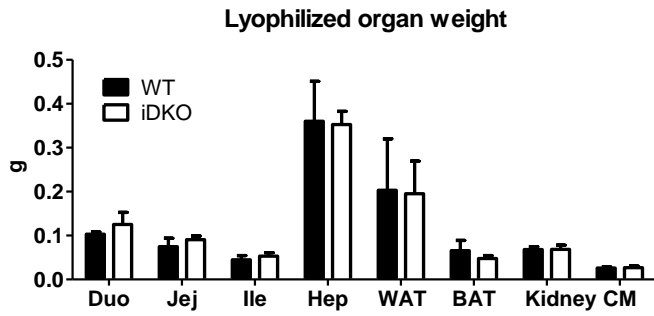

B

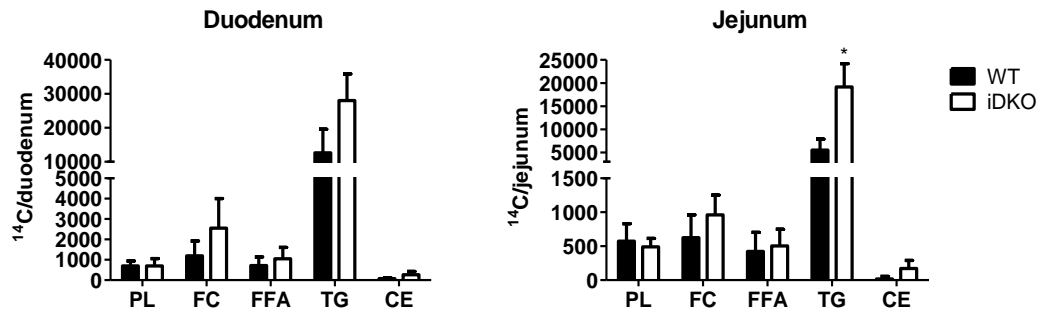

C

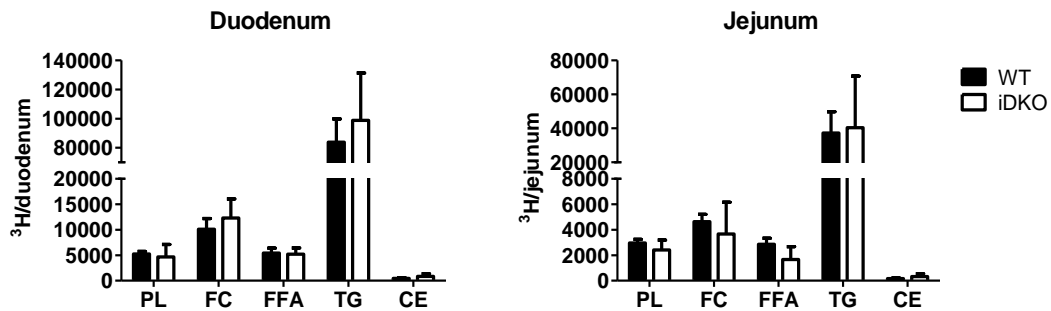

**Figure S4: Lipids ingested with the first meal accumulate in the SI of iDKO mice mainly in the TG fraction, related to Figure 3.** A) Lyophilized organ weights of WT and iDKO mice 10 h after administration of the first meal. B, C) After separation by thin-layer chromatography, radioactivity was determined in various lipid classes in the duodenum and jejunum of WT and iDKO mice. A) Distribution of  $^{14}\text{C}$ -triolein, representing the first oil bolus. B)  $^3\text{H}$ -triolein distribution, representing the second oil bolus. Data represent mean ( $n=3$ ) + SD. \*  $p < 0.05$ . Duo, duodenum; Jej, jejunum; Ile, ileum; Hep, hepar (liver) WAT/BAT, white/brown adipose tissue; CM, cardiac muscle (heart). PL, phospholipids; FC, free cholesterol; FFA, free fatty acids; TG, triglycerides; CE, cholesteryl esters.

Figure S5

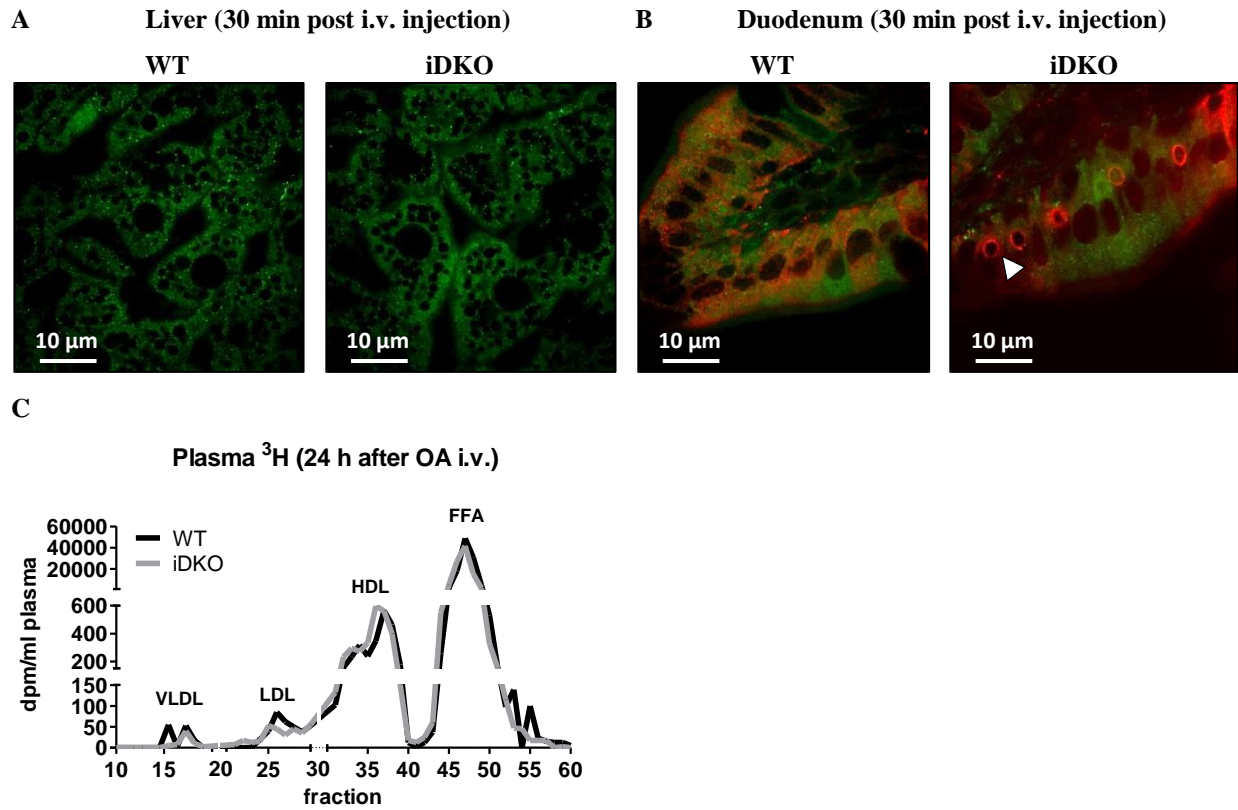

**Figure S5: Distribution of intravenously applied FAs, related to Figure 4.** Mice were injected i.v. with 20  $\mu\text{g}$  BODIPY® C16 (green) in Intralipid and sacrificed 30 min post-injection. A) Hepatic and B) intestinal sections. Intestinal sections were counterstained with perilipin 3 (PLIN3, red) to visualize early cLD formation. Arrowheads indicate endogenous cLDs coated with PLIN3. Magnification, 100x; scale bar, 10  $\mu\text{m}$ . C) Lipoprotein profile of 200  $\mu\text{l}$  pooled plasma (n=6-7) 24 h after i.v. injection of 3H-OA. Before sacrifice, mice were fasted for 12 h. VLDL, very low-density lipoprotein; LDL, low-density lipoprotein; HDL, high-density lipoprotein; FFA, free fatty acid.

Figure S6

A

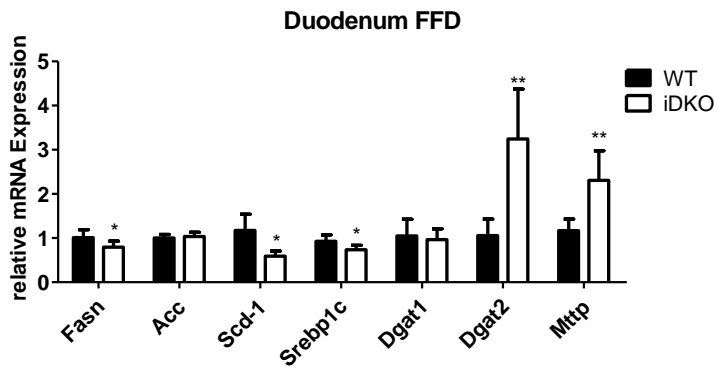

B

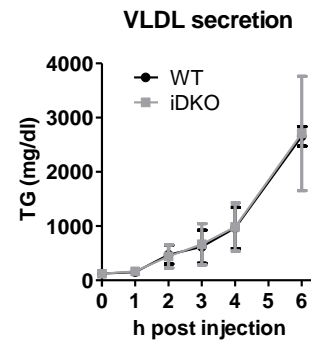

**Figure S6: *Atgl/Cgi-58* iDKO mice display decreased *de novo* lipogenesis, but increased *Dgat2* and *Mttp* mRNA expression after FFD feeding, related to Figure 5.** A) qRT-PCR analysis of genes involved in *de novo* lipogenesis. Data (n=5-6) were normalized to cyclophilin A expression as housekeeping gene. B) Hepatic VLDL secretion in 16 h-fasted WT and iDKO mice (n=8). Mice were injected with tyloxapol (500 mg/kg bodyweight) prior to blood collection. Data represent mean  $\pm$  SD. \*  $p < 0.05$ ; \*\*  $p \leq 0.01$ . *Fasn*, fatty acid synthase; *Acc*, acetyl-CoA carboxylase; *Scd-1*, stearoyl-CoA desaturase-1; *Srebp1c*, sterol regulatory element-binding protein 1; *Dgat*, acyl-CoA:diacylglycerol-acyltransferase; *Mttp*, microsomal triglyceride transfer protein.

Supplemental Table

**Table S1: Primer sequences, related to STAR methods**

| <b>Gene</b>         | <b>Forward primer</b>    | <b>Reverse primer</b>      |
|---------------------|--------------------------|----------------------------|
| <b>Acc</b>          | GGACTTGGAGCAGAGAACCTTCG  | CAAGCTGGTTGTTGGAGGTGTA     |
| <b>Atgl</b>         | GCCACTCACATCTACGGAGC     | GACAGCCACGGATGGTGTTTC      |
| <b>Ces1d</b>        | ATGGAGGTGGACTGGTGGTG     | AGTGCAGCCACCTGGTCCAA       |
| <b>Ces1e</b>        | CCAGTGACAGGGCAAATAGTC    | GTAGACAGGACCAGTCCATCATA    |
| <b>Ces1f</b>        | CAAGTGGCTGCTCTGCATTG     | TCCAGGAATGAAGGCCACAC       |
| <b>Ces2a</b>        | GTGGACTGGTTGTAGGATCAGC   | TTCTTCTGCACCCAGCGTAAG      |
| <b>Ces2c</b>        | CCTGTAGGACCACTGCGATT     | GAGATACAGGCAGTCCTCAG       |
| <b>Ces2e</b>        | CTTGATCCTGCCTCCCATCT     | GATAGCGACCACCACCACAT       |
| <b>Ces2f</b>        | GCCTACCATTATACCTGACTCCC  | CACAGCAGGCATAAACCTGAA      |
| <b>Ces2g</b>        | AGGTCCAAGGCAGGCTCAT      | GGCCCTCCATATTCATCGTAACA    |
| <b>Cgi-58</b>       | GGTTAAGTCTAGTGCAGC       | AAGCTGTCTCACCACCTTG        |
| <b>CyclophilinA</b> | CCATCCAGCCATTCACTCTT     | TTCCAGGATTCATGTGCCAG       |
| <b>Ddhd2</b>        | GAGTCCAGAGCGAAATGTCATC   | GGCGTCCATGTCTATGAGTTC      |
| <b>Dgat1</b>        | TCCGCCTCTGGGCATTC        | GAATCGGCCCAACAATCCA        |
| <b>Dgat2</b>        | AGTGGCAATGCTATCATCATCGT  | TCTTCTGGACCCATCGGCCCCAGGA  |
| <b>Fasn</b>         | GAAGCCGAACACCTCTGTGCAGT  | GCTCCTTGCTGCCATCTGTATTG    |
| <b>Hsl</b>          | GCTGGTGACACTCGCAGAAG     | TGGCTGGTGTCTCTGTGTCC       |
| <b>Lal</b>          | CGGCTTGCTGGCAGATTCTA     | GTGCAGCCTTGAGAATGACC       |
| <b>Mgl</b>          | CGGACTTCCAAGTTTTGTGTCAGA | GCAGCCACTAGGATGGAGATG      |
| <b>Mttp</b>         | GTCAACAGAGAGGCGAGAAG     | CTAGCCAAGCCTCTCTTGAG       |
| <b>Ptl</b>          | GCCATTGGAAGGATCACAGG     | CCTGGCATTTCGATTCCCTCC      |
| <b>Scd-1</b>        | CCGGAGACCCCTTAGATCGA     | TAGCCTGTAAAAGATTTCTGCAAACC |
| <b>Srebp1c</b>      | CCATCGACTACATCCGCTTCTT   | ACTTCGCAGGGTTCAGGTTCTC     |
